# Supplementary material for: Second harmonic generation in laterally azo-bridged H-shaped ferroelectric dimesogens
Source: Royal Society of Chemistry journal article supplement (doi:10.1039/c0jm00012d), 2010-01-01
Supplement: c0jm00012d.pdf [file c0jm00012d.pdf]

## Electronic Supplementary Information (ESI)

### Second Harmonic Generation in Laterally Azo-Bridged H-Shaped Ferroelectric Dimesogens<sup>†</sup>

Josu Martinez-Perdiguero,<sup>a</sup> Yongqiang Zhang,<sup>\*b</sup> Christopher Walker,<sup>b</sup> Jesus Etxebarria,<sup>\*a</sup> C. L. Folcia,<sup>a</sup> Josu Ortega,<sup>a</sup> Michael J. O'Callaghan,<sup>b</sup> Ute Baumeister<sup>c</sup>

<sup>a</sup> University of the Basque Country, 48080 Bilbao, Spain. E-mail: [j.etxeba@ehu.es](mailto:j.etxeba@ehu.es);  
Fax: +34 94 6013500; Tel: +34 94 6013500

<sup>b</sup> Displaytech, Inc. (Displaytech, Inc. is now part of Micron Technology, Inc.), 2602 Clover Basin Drive, Longmont, CO 80503, USA. E-mail: [yqzhang@micron.com](mailto:yqzhang@micron.com);  
Fax: +1 303 7722193; Tel: +1 303 7742211

<sup>c</sup> Institute of Chemistry, Physical Chemistry, Martin Luther University Halle-Wittenberg, von-Danckelmann-Platz 4, D-06120 Halle, Germany

#### 1. Estimation of the hyperpolarizability of DR-1 chromophore at 1.6 $\mu\text{m}$

It was reported that the  $\beta$  value of DR-1 chromophore at 1.9  $\mu\text{m}$  is  $\beta(1.9) = 49 \times 10^{-30}$  esu. According to the two-level model, the  $\beta$  value of DR-1 chromophore at 1.6  $\mu\text{m}$  is estimated by the following equation:

$$\frac{\beta(\lambda)}{\beta(\lambda')} = \frac{\left[1 - \left(\frac{2\lambda_0}{\lambda}\right)^2\right] \left[1 - \left(\frac{\lambda_0}{\lambda}\right)^2\right]}{\left[1 - \left(\frac{2\lambda_0}{\lambda'}\right)^2\right] \left[1 - \left(\frac{\lambda_0}{\lambda'}\right)^2\right]}, \quad (\text{a})$$

where  $\lambda_0$  is the resonator wavelength. In this specific case,  $\lambda' = 1.6 \mu\text{m}$ ,  $\lambda = 1.9 \mu\text{m}$ , and  $\lambda_0 = 0.53 \mu\text{m}$  (the maximum absorption wavelength of compound **2**). The  $\beta$  value at 1.6  $\mu\text{m}$  is obtained,  $\beta(1.6) = 62 \times 10^{-30}$  esu.

#### 2. The origin of Eq. (4)

The equation (4) is obtained by the transformation of a third rank tensor when the reference frame is rotated by an angle  $\theta$  (i.e., the tilt angle) about the y-axis (see the

transformation in Fig. S1). In general the transformation of the third rank tensor is expressed as

$$\beta_{I,J,K}^{(d)} = \sum_{i,j,k} A_{Ii} A_{Jj} A_{Kk} \beta_{i,j,k}^{(d)} \quad (b)$$

where all indices go from 1 to 3.

In the particular case the rotation matrix is

$$A = \begin{pmatrix} \cos \theta & 0 & -\sin \theta \\ 0 & 1 & 0 \\ \sin \theta & 0 & \cos \theta \end{pmatrix} \quad (c)$$

Take  $\beta_{YZZ}^{(d)} = \beta_{233}^{(d)}$  as an example.  $\beta_{233}^{(d)}$  is expressed as

$$\begin{aligned} \beta_{233}^{(d)} &= \sum_{ijk} A_{2i} A_{3j} A_{3k} \beta_{ijk}^{(d)} = \sum_{jk} A_{3j} A_{3k} \beta_{2jk}^{(d)} = A_{31} A_{31} \beta_{211}^{(d)} + A_{31} A_{33} \beta_{213}^{(d)} + A_{33} A_{31} \beta_{213}^{(d)} + A_{33} A_{33} \beta_{233}^{(d)} \\ &= A_{31} A_{31} \beta_{yxx}^{(d)} + A_{33} A_{33} \beta_{yzz}^{(d)} = \sin^2 \theta \beta_{yxx}^{(d)} + \cos^2 \theta \beta_{yzz}^{(d)} \end{aligned} \quad (d)$$

Then the  $d_{23}$  (i.e.,  $d_{233}$  in three-indices notation) coefficient is

$$d_{23} = Nf^3 \beta_{YZZ}^{(d)} = Nf^3 (\beta_{yxx}^{(d)} \sin^2 \theta + \beta_{yzz}^{(d)} \cos^2 \theta) \quad (e)$$

The other three  $\mathbf{d}$  tensor components,  $d_{22}$ ,  $d_{21}$ , and  $d_{14}$  are obtained as shown in eq. (4) by following the same operation as shown above.

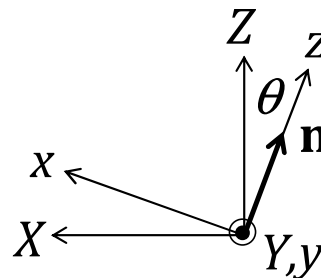

**Fig. S1.** The transformation from the molecular xyz reference system to the laboratory XYZ reference system involves the counter-clockwise rotation by an angle  $\theta$  (i.e., the tilt angle) about the y-axis.
